# Supplementary material for: Community shift of ammonia-oxidizing bacteria along an anthropogenic pollution gradient from the Pearl River Delta to the South China Sea
Source: PubMed Central journal article supplement — Appl Microbiol Biotechnol. 2011 Oct 18;94(1):247–59. doi: 10.1007/s00253-011-3636-1 (PMC3304064; doi:10.1007/s00253-011-3636-1), 2011-10-18
Supplement: 253_2011_3636_MOESM1_ESM.pdf [file 253_2011_3636_MOESM1_ESM.pdf]

1 **Supplementary Information**

2

3 **Table S1. Physicochemical parameters of the surface sediments in the northern SCS**

4

| Sample name | Sampling Position | Seawater depth (m) | Temperature (°C) | NH <sub>4</sub> <sup>+</sup> (μmol/L) | NO <sub>2</sub> <sup>-</sup> (μmol/L) | NO <sub>2</sub> <sup>-</sup> +NO <sub>3</sub> <sup>-</sup> (μmol/L) |
|-------------|-------------------|--------------------|------------------|---------------------------------------|---------------------------------------|---------------------------------------------------------------------|
| 407         | 18°29N/120°00E    | 1900               | 2~4              | 16.50±0.48                            | 0.37±0.02                             | 9.2±0.23                                                            |
| 525         | 19°23N/114°36E    | 1100               | 2~4              | 25.67±0.46                            | 1.06±0.06                             | 13.3±0.24                                                           |
| CF5         | 19°55N/115°13E    | 1153               | 2~4              | 275.18±1.85                           | 0.68±0.04                             | 259.7±2.37                                                          |
| 08CF7       | 22°70N/119°17E    | 1301               | 2~4              | 42.24±0.83                            | 2.70±0.11                             | 17.1±0.97                                                           |
| 425         | 18°31N/110°59E    | 1470               | 2~4              | 38.79±0.79                            | 0.40±0.02                             | 16.5±0.83                                                           |
| 510         | 19°30N/110°46E    | 76                 | 19.8             | 43.11±1.40                            | 0.38±0.03                             | 10.3±0.93                                                           |
| 201         | 21°41N/116°18E    | 30                 | 21.6             | 137.03±1.92                           | 0.59±0.08                             | 39.9±2.12                                                           |

5 Table S2. Statistical analysis of physicochemical parameters and the diversity and abundance of  
 6 nitrifying prokaryotes

| Environmental parameters                                   | Pearson moment correlation <sup>1</sup> |         |         |       | 7  |
|------------------------------------------------------------|-----------------------------------------|---------|---------|-------|----|
|                                                            | OTUs                                    | Simpson | Shannon | Chao1 | 8  |
| Depth                                                      | 0.72*                                   | -0.47   | 0.58*   | 0.29  | 9  |
| T                                                          | -0.82*                                  | 0.43    | -0.51   | -0.37 | 10 |
| NH <sub>4</sub> <sup>+</sup>                               | -0.03                                   | 0.06    | -0.21   | -0.28 | 11 |
| NO <sub>2</sub> <sup>-</sup>                               | 0.11                                    | -0.12   | 0.22    | 0.61* | 12 |
| NO <sub>2</sub> <sup>-</sup> +NO <sub>3</sub> <sup>-</sup> | 0.11                                    | -0.03   | -0.09   | -0.18 | 13 |

16 Pearson moment correlation ( $r$ ) deduced on the basis of the equation followed:  $r = \frac{n(\sum XY) - (\sum X)(\sum Y)}{\sqrt{[n\sum X^2 - (\sum X)^2][n\sum Y^2 - (\sum Y)^2]}}$ .

17 Asterisks indicates the significant level at the  $P < 0.05$  determined by Excel function TDIST.  $t$  value calculated by

18 the following equation:  $t = \frac{r\sqrt{n-2}}{\sqrt{1-r^2}}$  ( $n$ , the number of sampling sites).

19

20 Figure S1 A map showing the sampling sites employed in the current study

21

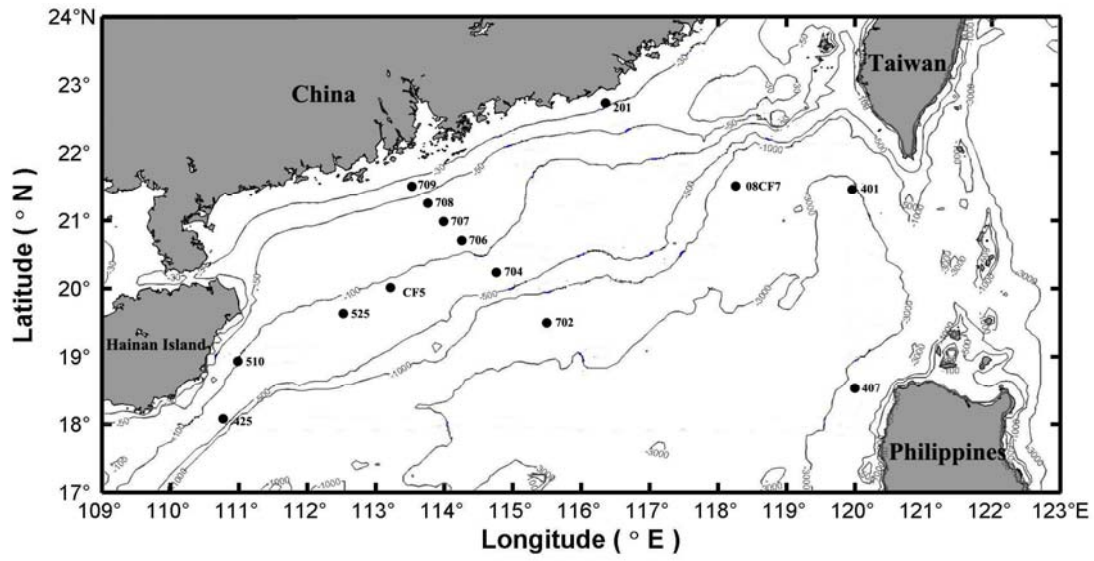

22

23

**Fig. S1**

24 Figure S2 Alignments of deduced amino acid sequences of AmoA from the A5-16 cluster and other closed lineages.

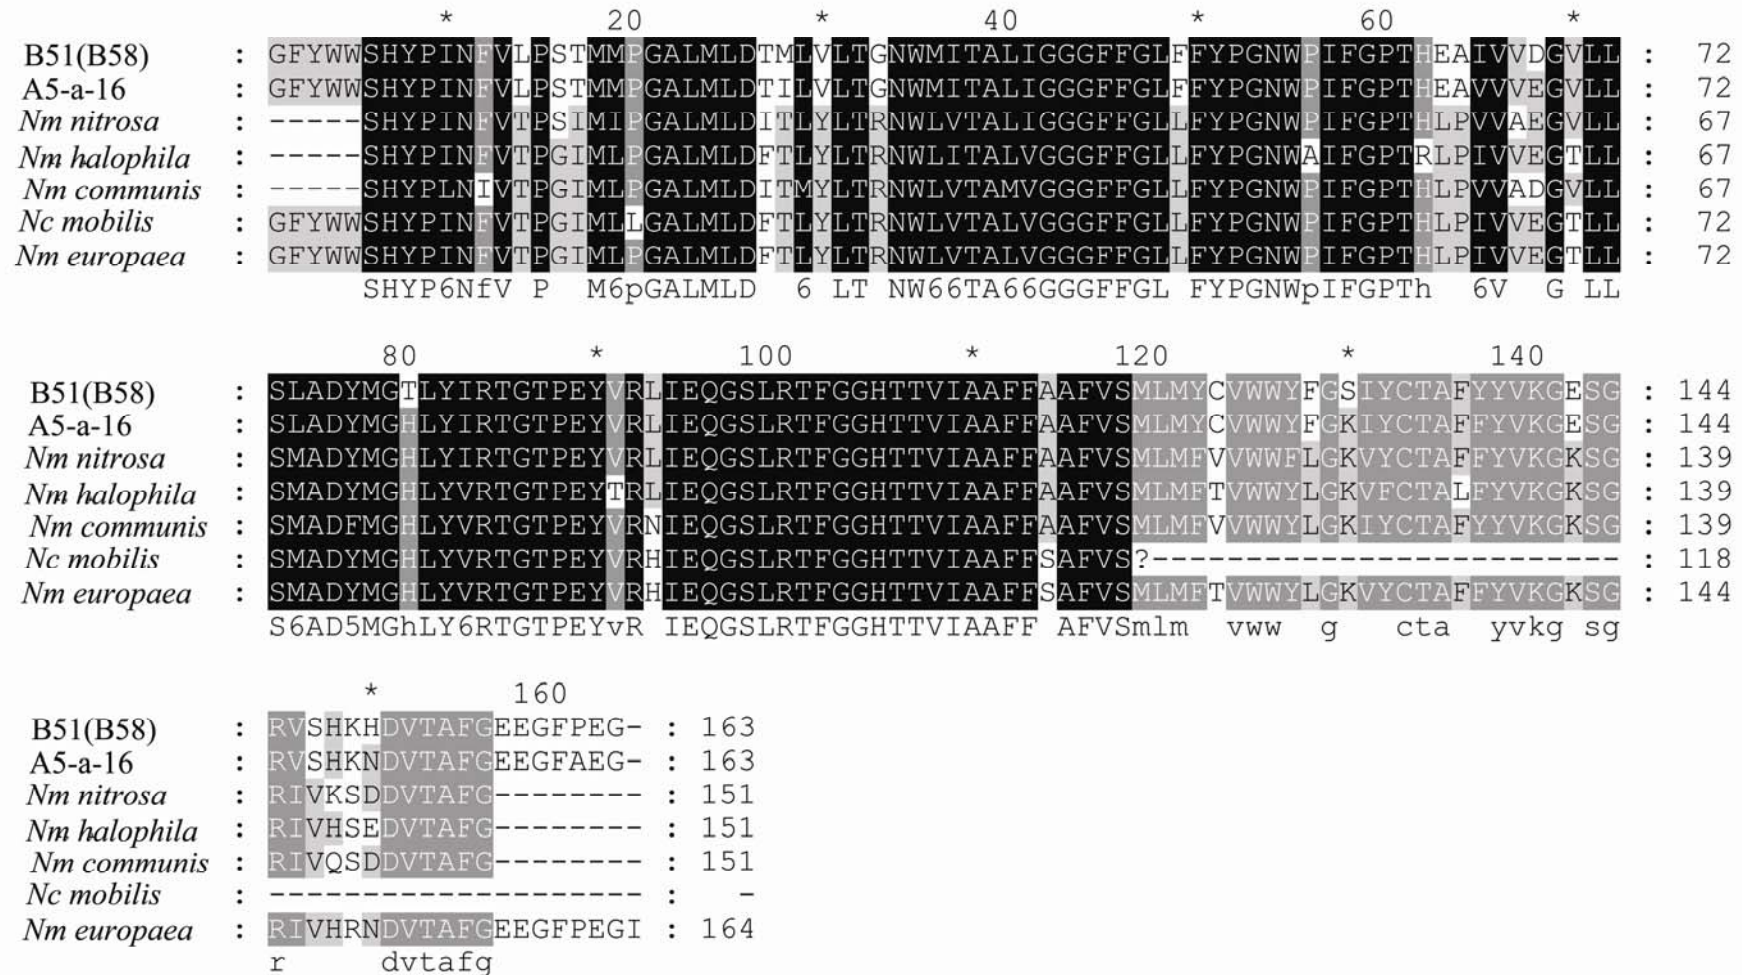

25  
26 Nm: *Nitrosomonas*; Nc: *Nitrosococcus*

27  
28
